# Supplementary material
Source: PubMed Central journal article supplement (PMC3160188)

## Supplementary Figure Legends

**Figure S1** Splicing reactions of internally labeled precursor transcripts with a wild-type or IC1 UA:UA mutant sequence. Products were separated on a denaturing 4% polyacrylamide gel which was fixed and dried prior to exposure and quantitation with a PhosphorImager (Molecular Dynamics). For expected lengths and identification of splicing products, see Costa et al. (1997b).

**Figure S2** Time courses of splicing reactions of wild-type and IC1 UA:UA mutant transcripts. (A) (B) ammonium-containing buffer; (C) (D) potassium-containing buffer. For kinetic parameters and their determination, see Table I and Materials and Methods.

**Figure S3** Splicing reactions of construct 3C in the presence of 1  $\mu$ M of an oligonucleotide with a 1T tether and either a matched or mismatched anti-IC1 anchor, compared with a wt splicing reaction (see legend to Fig. S1 for methods). Expected lengths for construct 3C: precursor, 850 nt; intron-3'exon, 724 nt; lariat and linear intron, 618 nt; ligated exons, 232 nt. For the wild-type, all intron-containing forms are 22 nt longer.

Supplementary Figure S1 (Li et al.)

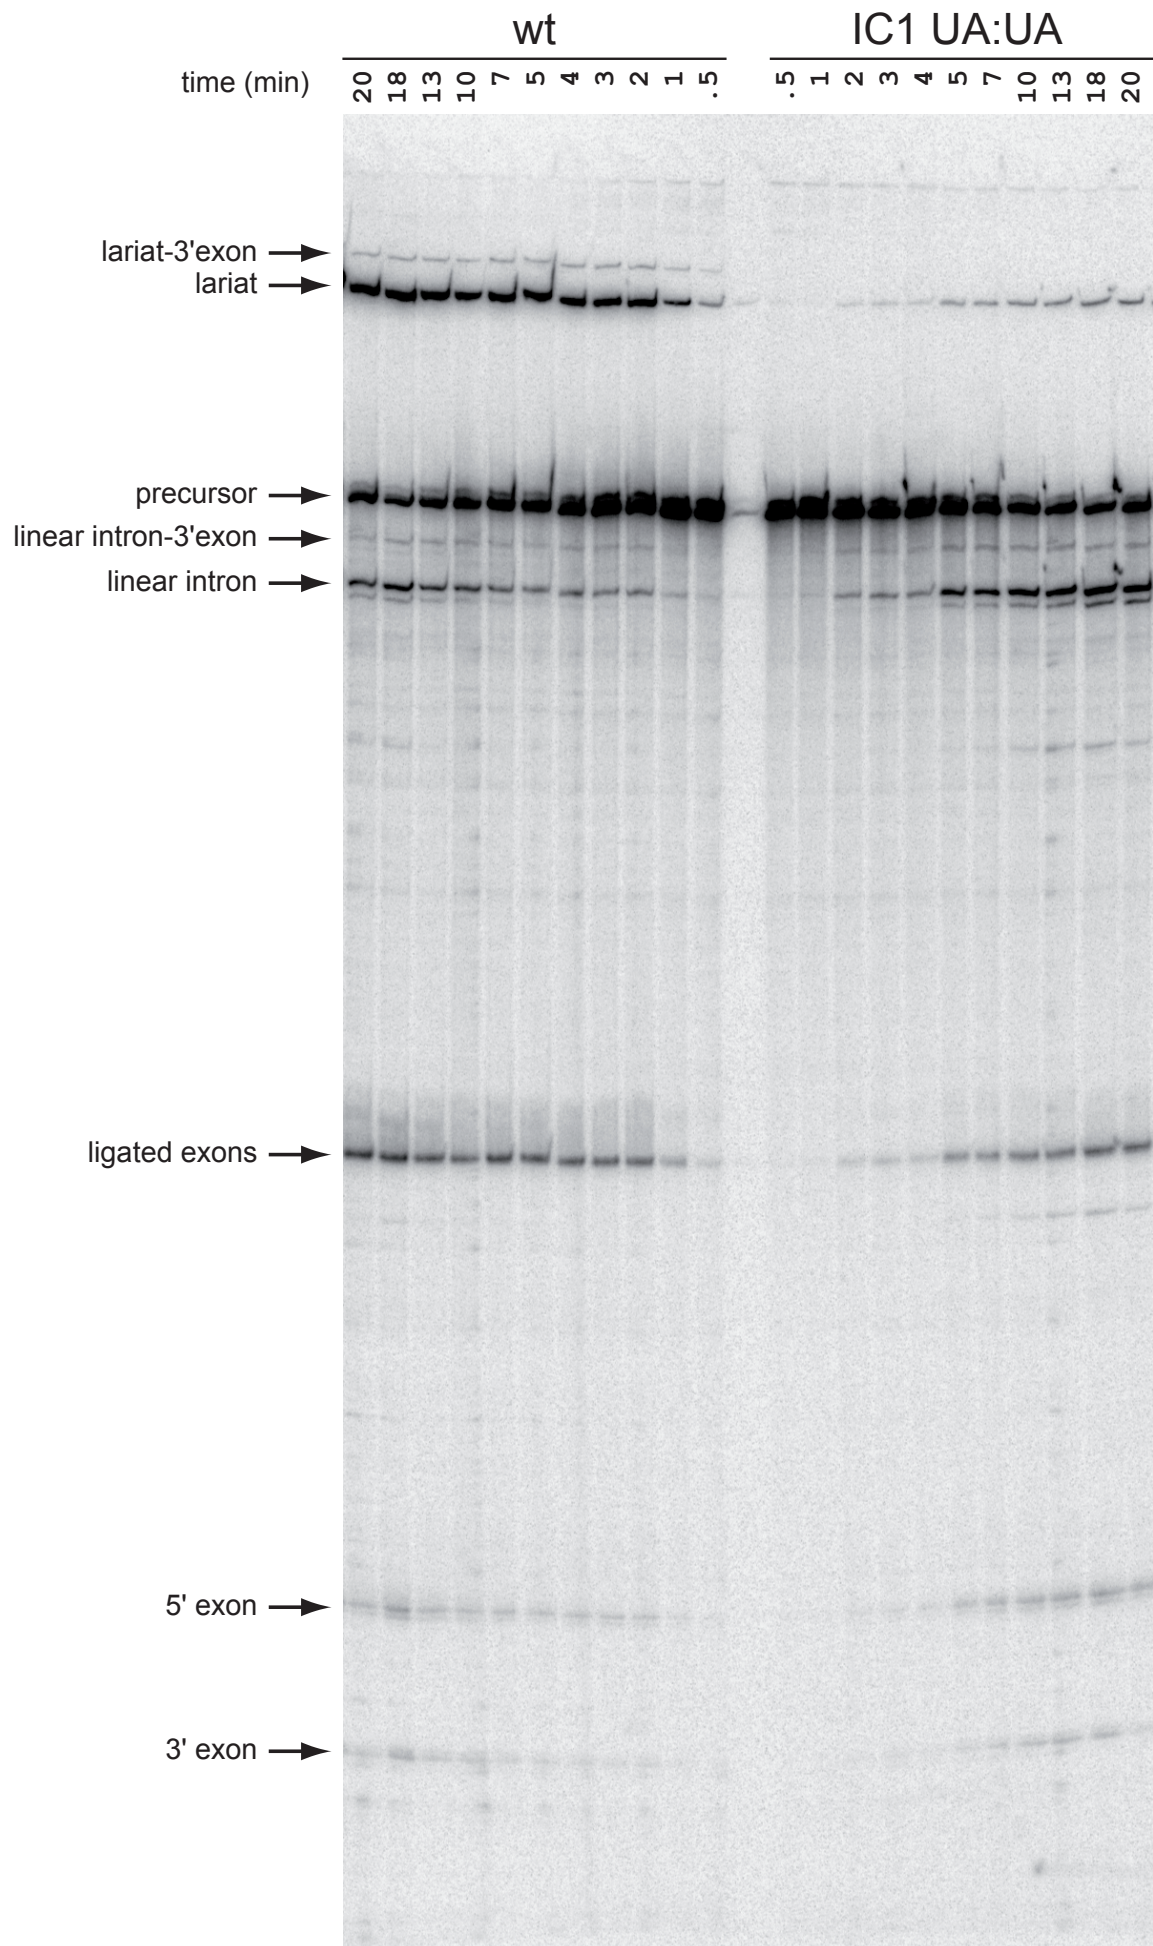

# Supplementary Figure S2 (Li et al.)

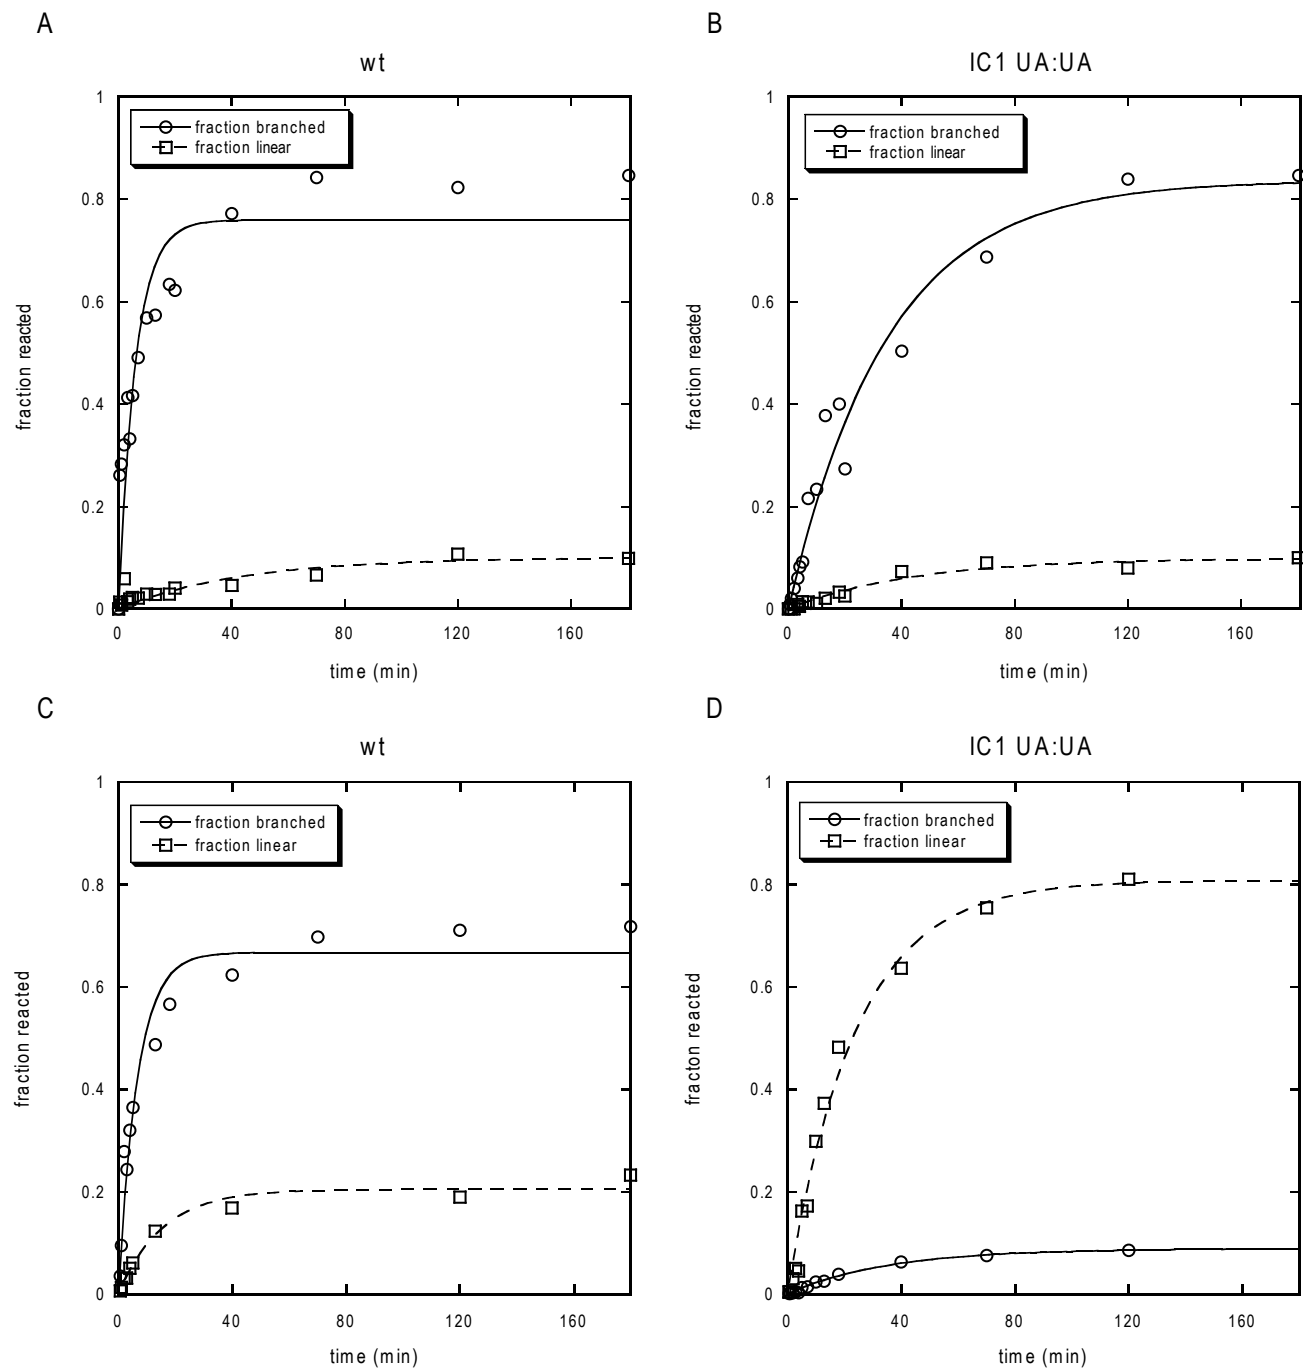

Supplementary Figure S3 (Li et al.)

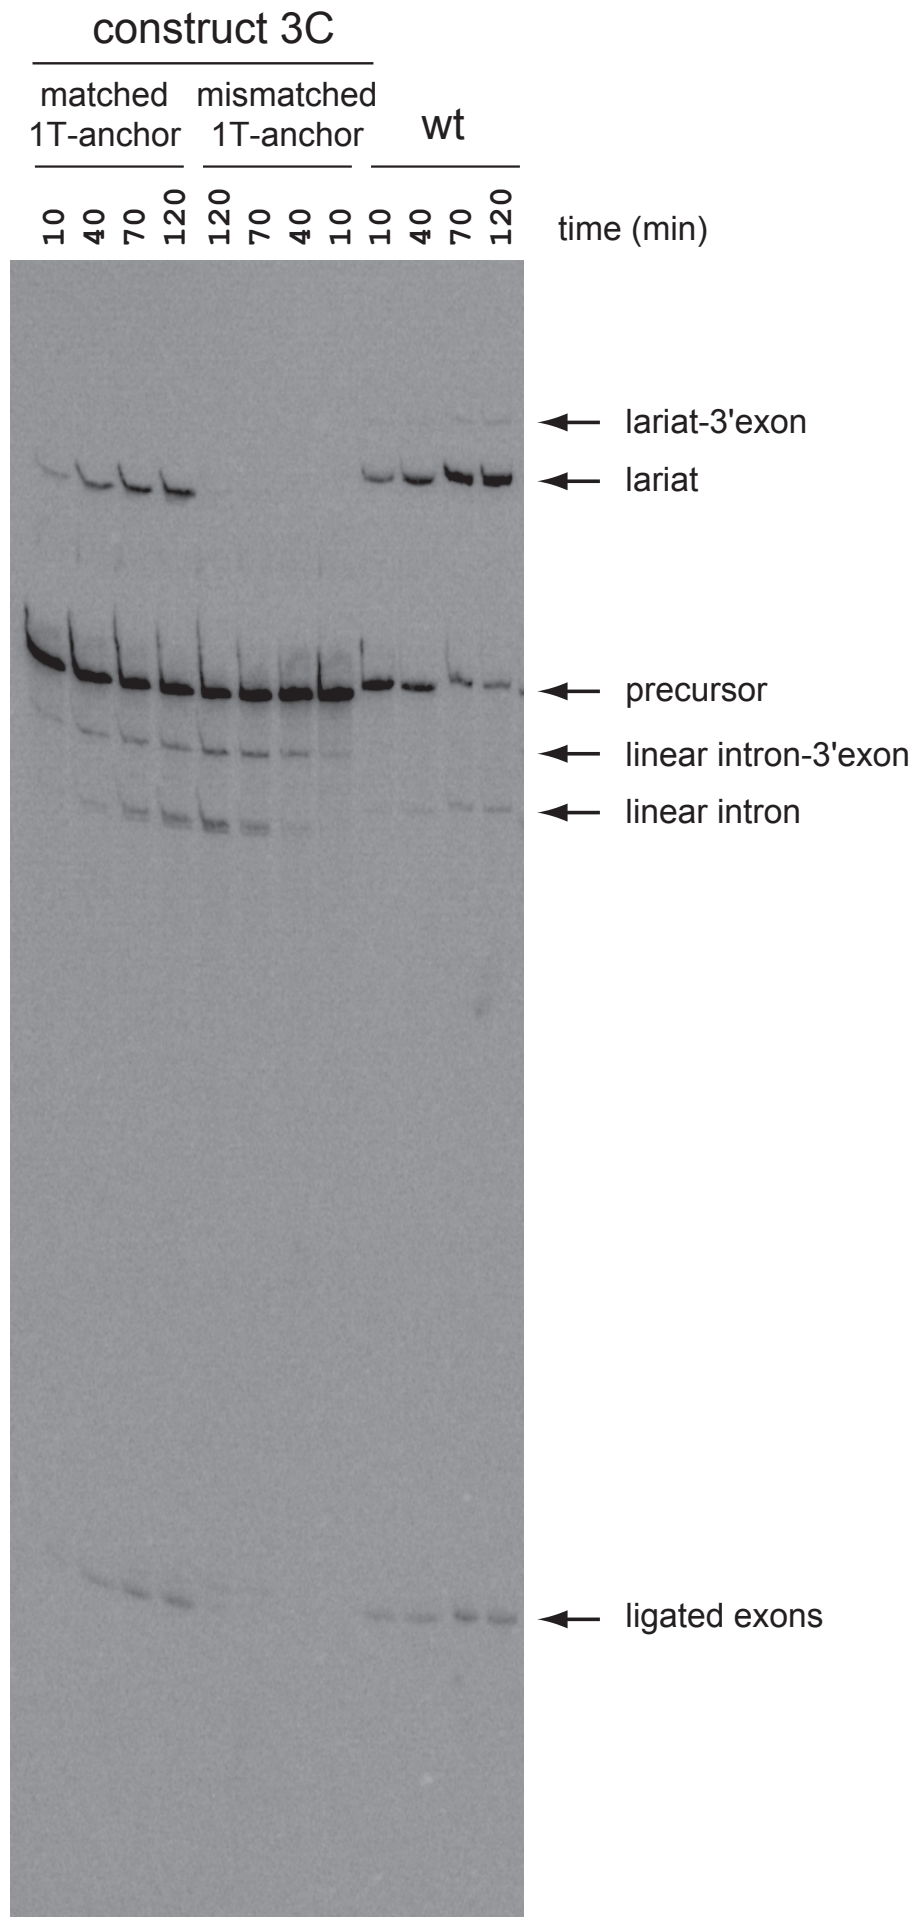

Supplement: emboj2011214s1.pdf [file emboj2011214s1.pdf]
